# Supplementary material for: Atomic resolution cryo-EM structure of a native-like CENP-A nucleosome aided by an antibody fragment
Source: PubMed Central journal article supplement (PMC6534667; doi:10.1038/s41467-019-10247-4), 2019-05-24
Supplement: 41467_2019_10247_MOESM1_ESM.pdf [file 41467_2019_10247_MOESM1_ESM.pdf]

## **Supplementary Information**

**Atomic resolution cryo-EM structure of a native-like CENP-A nucleosomes aided  
by an antibody fragment**

Zhou et al.

Supplementary Figures: 1 – 14

Supplementary Table 1

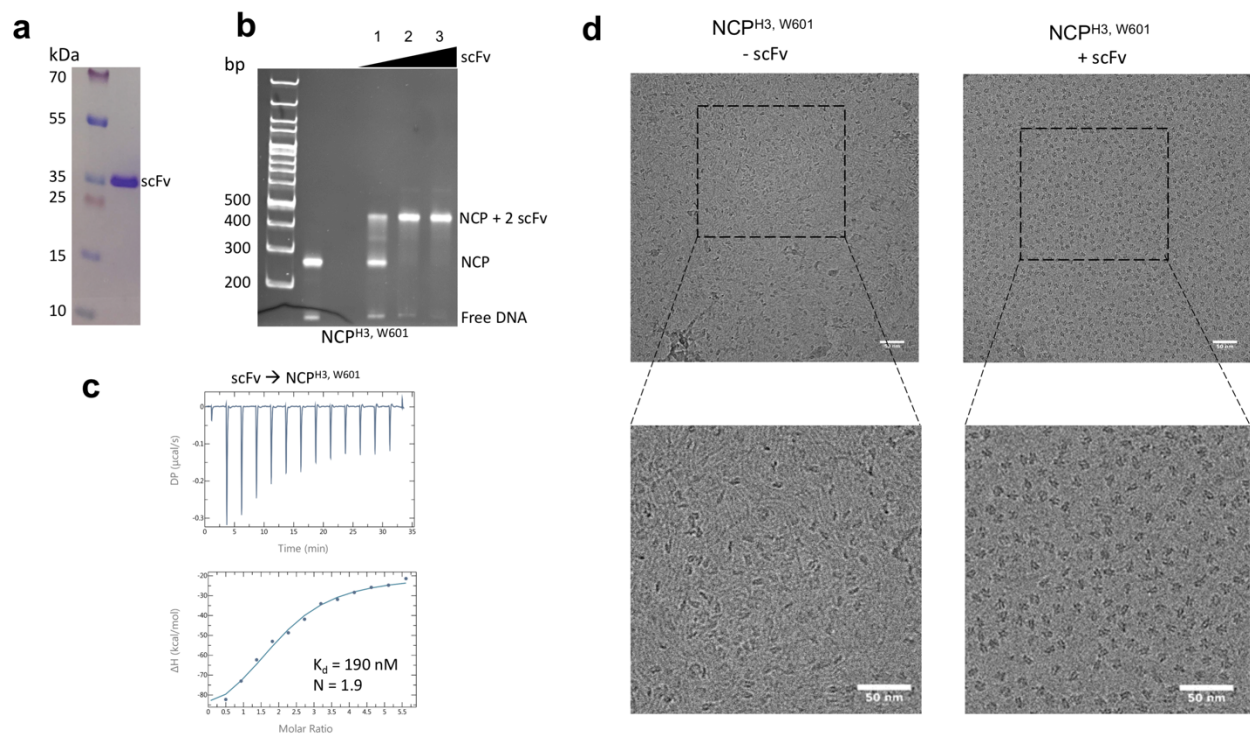

**Supplementary Figure 1. Biochemical characterization of the interaction between scFv and NCP<sup>H3, W601</sup>.**

- a.** SDS PAGE gel of the scFv (29 kDa) after purification.
- b.** Electrophoretic mobility shift assay of scFv binding to NCP<sup>H3, W601</sup>.
- c.** ITC profile of scFv titrated into NCP<sup>H3, W601</sup> solution, binding affinity and stoichiometry are indicated.
- d.** Representative cryo-EM images of NCP<sup>H3, W601</sup> without (left) and with scFv. Scale bar is 50 nm.

Uncropped gel images are provided as a Source Data file

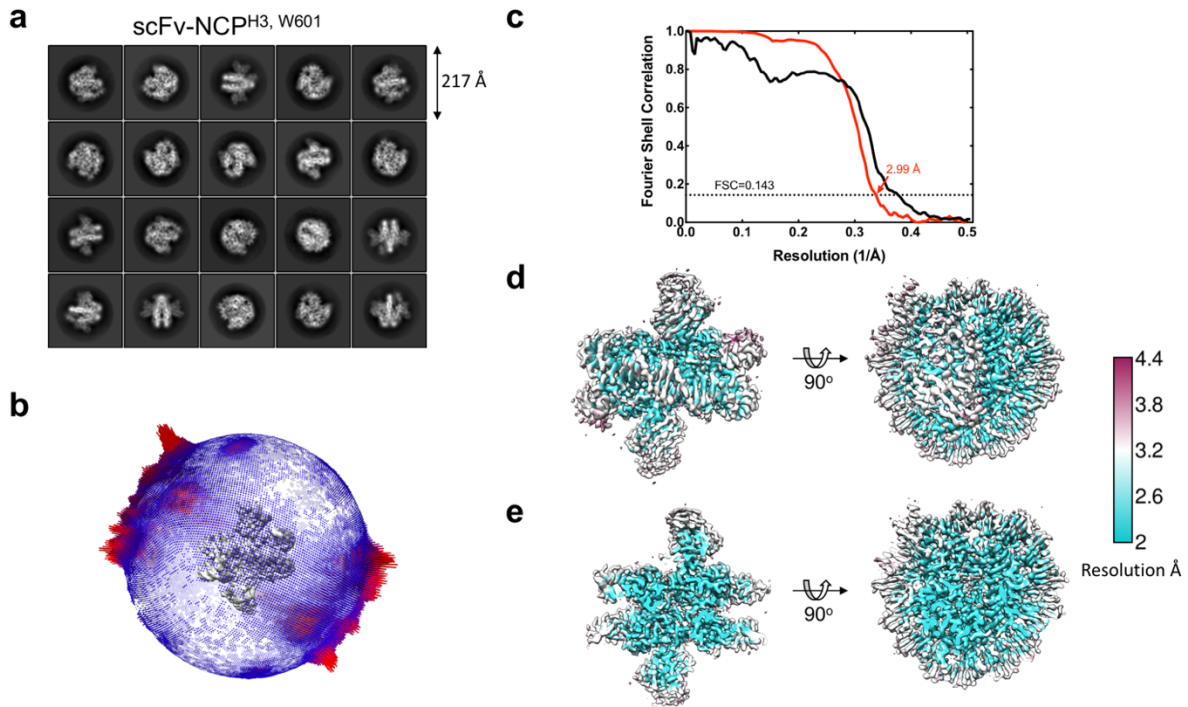

### Supplementary Figure 2. Cryo-EM analysis of scFv-NCP<sup>H3, W601</sup>

- Representative 2D class averages of scFv-NCP<sup>H3, W601</sup> particles.
- Euler angle distribution of particles used in the final 3D reconstruction, the height of the cylinder is proportional to the number of particles for that view.
- Gold-standard Fourier shell correlation (FSC) curves of the final density map. Reported resolutions were based on the FSC=0.143 criteria. Red curve is scFv- CP<sup>H3, W601</sup> half map FSC and black curve is the model versus map FSC.
- The final 3D density map of the scFv-NCP<sup>H3, W601</sup> complex shown in the indicated views is colored according to the local resolution estimated by the software ResMap.
- The final half sliced 3D density map of the scFv-NCP<sup>H3, W601</sup> complex shown in the indicated views is colored according to the local resolution estimated by the software ResMap.

Data for the plot are provided as a Source Data file

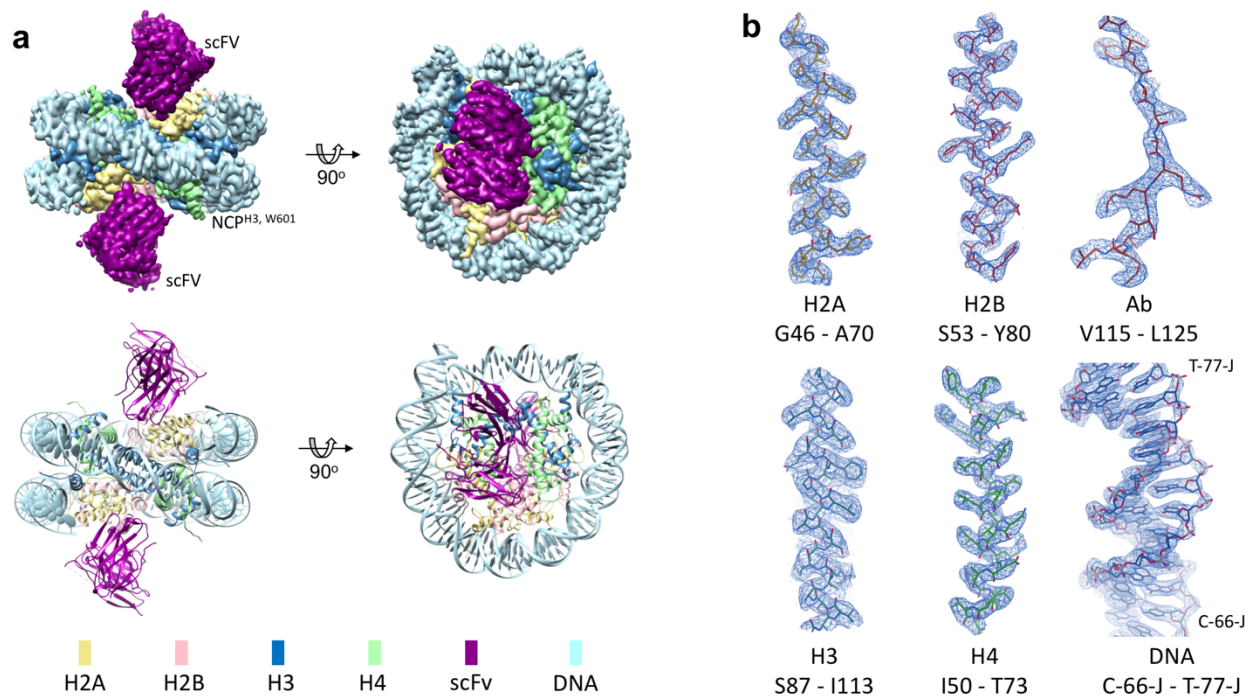

**Supplementary Figure 3. Cryo-EM structure of the scFv-NCP<sup>H3, W601</sup> complex**

- a.** Top, 3.0 Å resolution cryo-EM map of the scFv- NCP<sup>H3, W601</sup> complex. Left, side view; Right, top view. Color code: Light yellow, H2A; Pink, H2B; Blue, H3; Light green, H4; Dark magenta, scFv; light blue, DNA. Bottom: the fitted structure model.
- b.** Examples of cryo-EM densities map of histone proteins, scFv and DNA generated in Coot.



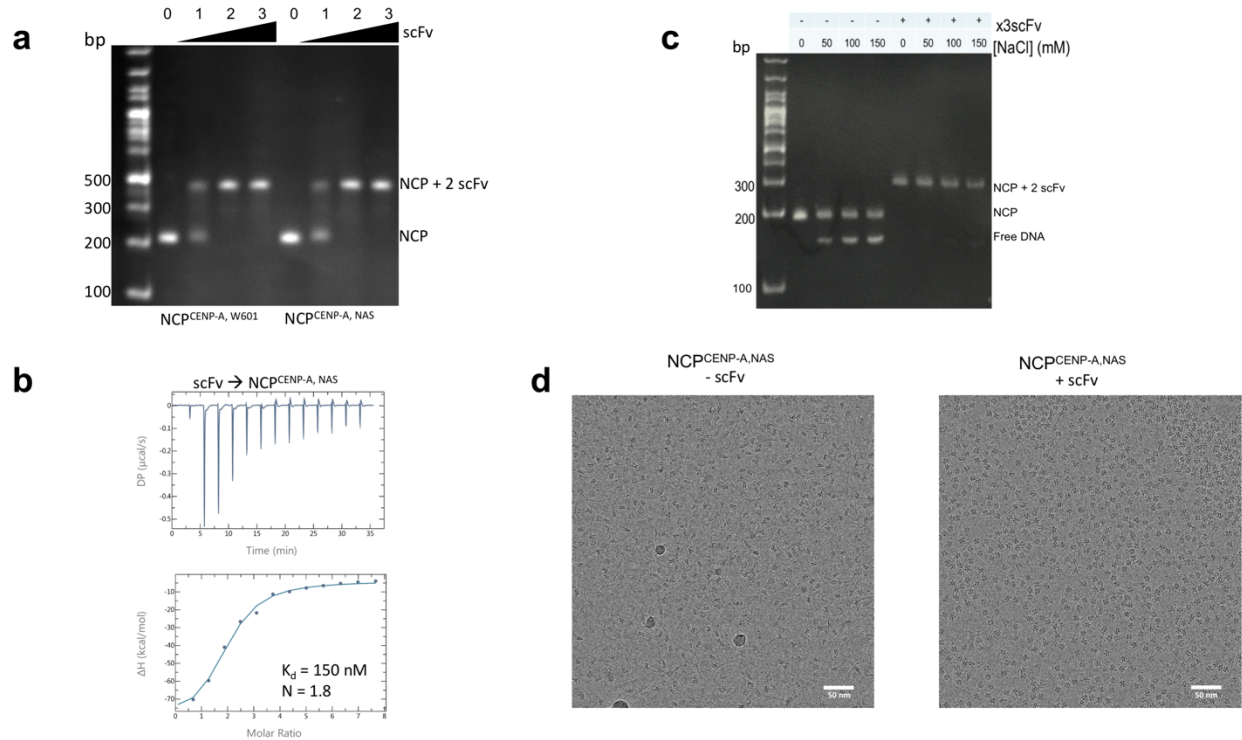

**Supplementary Figure 4. Biochemical characterization of the interaction of scFv with the CENP-A nucleosome and stabilization analysis**

- a. Electrophoretic mobility shift assay of scFv binding to NCP<sup>CENP-A, W601</sup> (lane 2 – 5) or NCP<sup>CENP-A, NAS</sup> (lane 6 – 9).
- b. ITC profile of scFv titrated into NCP<sup>CENP-A, NAS</sup> solution, binding affinities and stoichiometry are indicated.
- c. Electrophoretic assay of NCP<sup>CENP-A, NAS</sup> (lane 2 – 5) or scFv-NCP<sup>CENP-A, NAS</sup> complex (lane 6 – 9) at various salt concentration.
- d. Representative cryo-EM images of NCP<sup>CENP-A, NAS</sup> without (left) and with (right) scFv. Scale bar is 50 nm.

Uncropped gel images are provided as a Source Data file

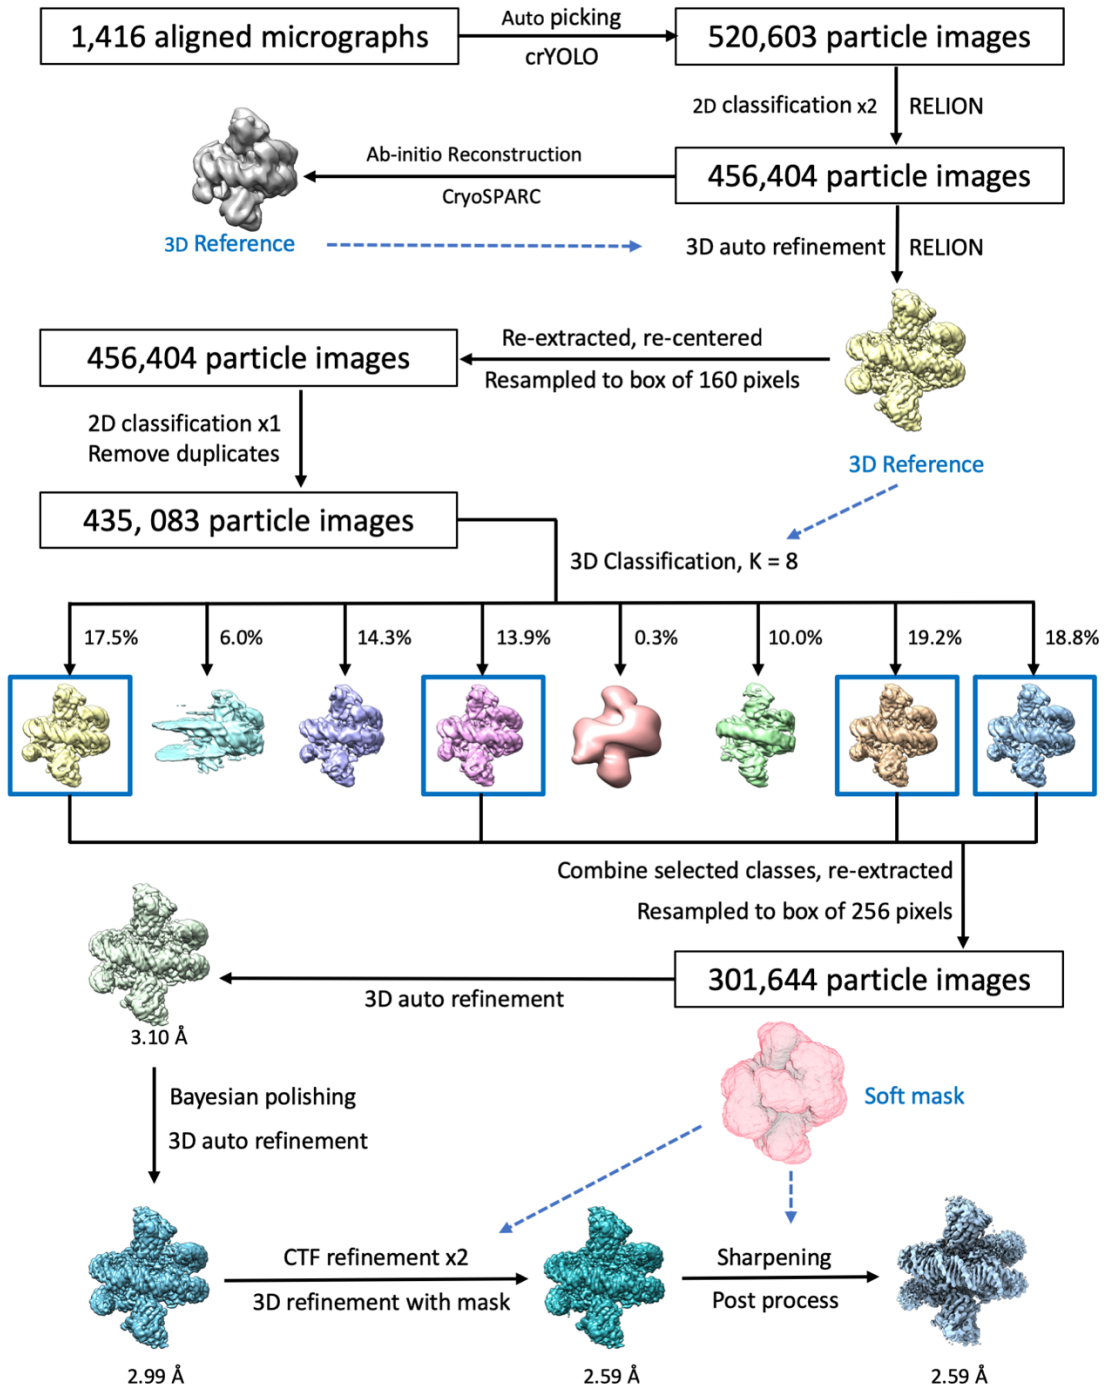

**Supplementary Figure 5. Flowchart of data processing of scFv-NCP<sup>CENP-A</sup>, NAS**

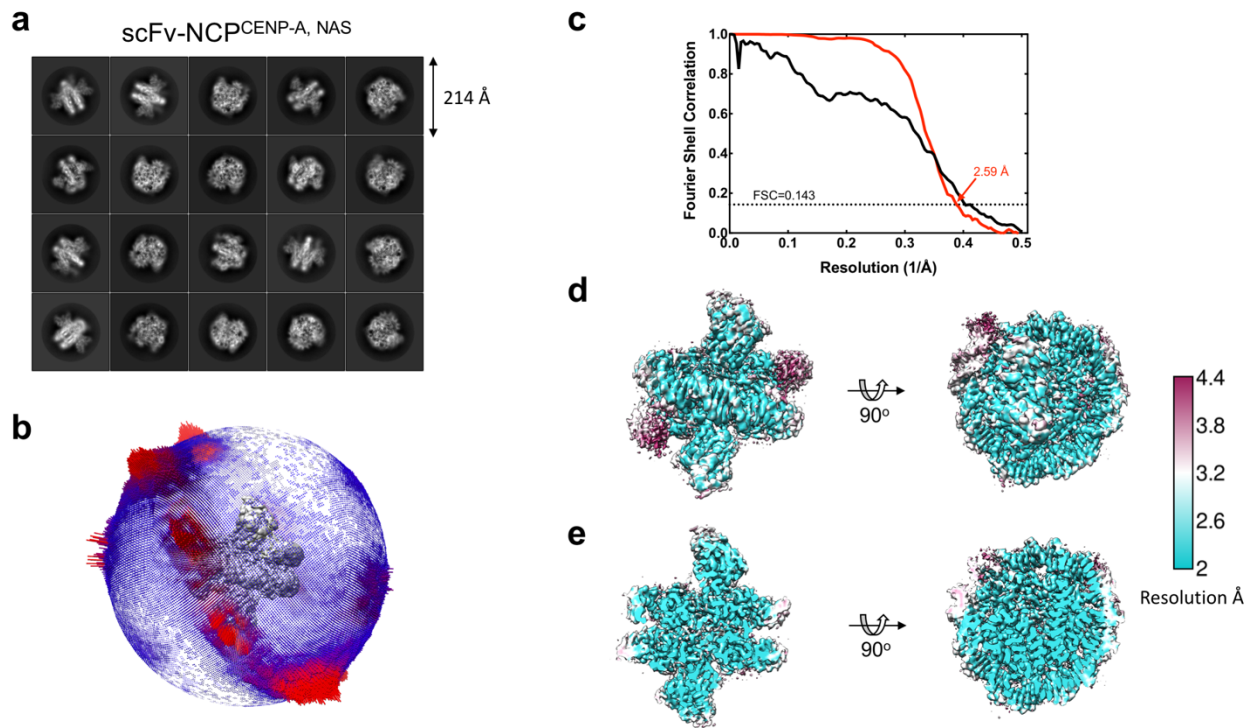

### Supplementary Figure 6. Cryo-EM analysis of scFv-NCP<sup>CENP-A, NAS</sup>

- Representative 2D class averages of scFv-NCP<sup>CENP-A, NAS</sup> particles.
- Euler angle distribution of particles used in the final 3D reconstruction, the height of the cylinder is proportional to the number of particles for that view.
- Gold-standard Fourier shell correlation (FSC) curves of the final density map. Reported resolutions were based on the FSC=0.143 criteria. Red curve is the scFv-NCP<sup>CENP-A, NAS</sup> FSC of two independent half maps and black curve is the structural model versus summed map FSC calculated by RELION.
- The final 3D density map of scFv-NCP<sup>CENP-A, NAS</sup> shown in the indicated views is colored according to the local resolution estimated by the software ResMap.
- The final half sliced 3D density map of scFv-NCP<sup>CENP-A, NAS</sup> shown in the indicated views is colored according to the local resolution estimated by the software ResMap.

Data for the plot are provided as a Source Data file

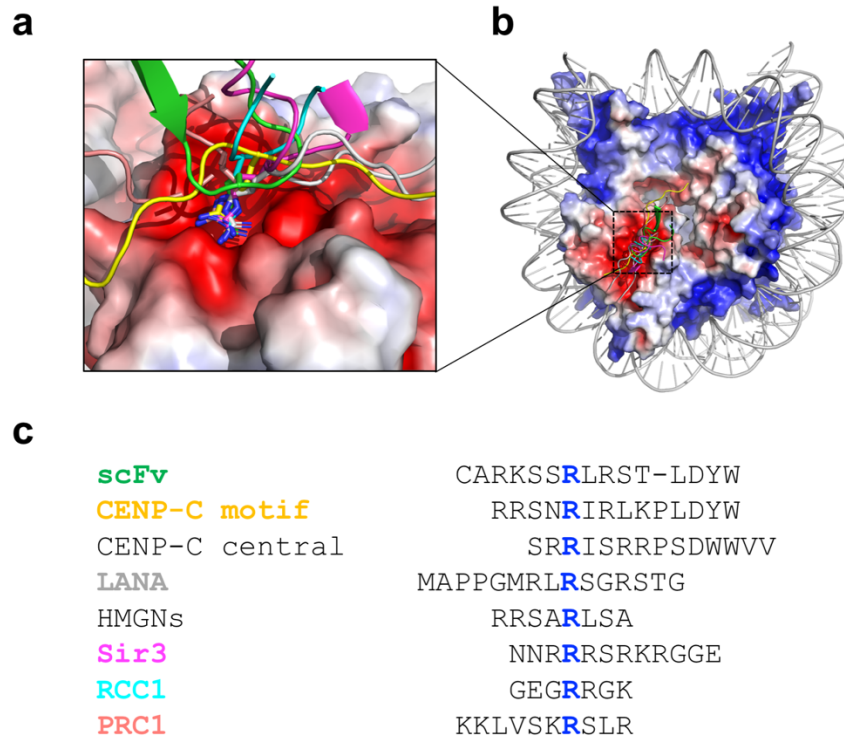

**Supplementary Figure 7. Various nucleosome binding proteins share the same “Arginine” anchor that inserts into the acidic patch pocket.**

**a.** Close-up view of various nucleosome binding proteins interacting with acidic patch.

The anchoring arginine side chains from scFv (green), CENP-C motif (yellow), LANA (grey), Sir3(magenta), RCC1(cyan), and PRC1(pink) are illustrated in sticks, and the proteins are shown as cartoons.

**b.** The regions of scFv, CENP-C motif, LANA, Sir3, RCC1, and PRC1 that interact with nucleosome acidic patch are overlaid together. Nucleosome histone octamer is shown with surface electrostatic potential view. DNA is shown as cartoon.

**c.** Local sequences of proteins that bind to the acidic patch. Alignment was made using the anchoring arginine residues of scFv, CENP-C motif and central region, LANA, HMGN, Sir3, RCC1, and PRC1.

**a**

Histone octamer

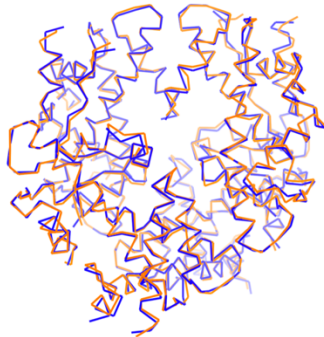

Cryo-EM structure  
scFv-NCP<sup>CENP-A, NAS</sup>  
X-ray structure  
PDB ID: 3AN2

Backbone R. M. S. D. = 0.6 Å

**b**

H2A-H2B dimer

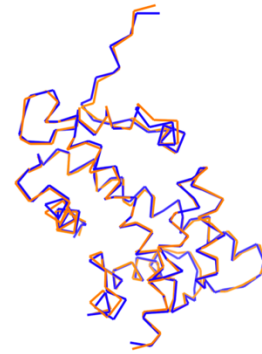

Backbone R. M. S. D. = 0.4 Å

**Supplementary Figure 8. Structure of the core histone proteins is not affected by scFv binding.**

- a. Alignment of the structures of all core histones in NCP<sup>CENP-A, NAS</sup> and the NCP<sup>CENP-A, PAS</sup> crystal structure (PDB ID: 3AN2).
- b. Alignment of the structures of core histones H2A and H2B in NCP<sup>CENP-A, NAS</sup> and the NCP<sup>CENP-A, PAS</sup> crystal structure (PDB ID: 3AN2).

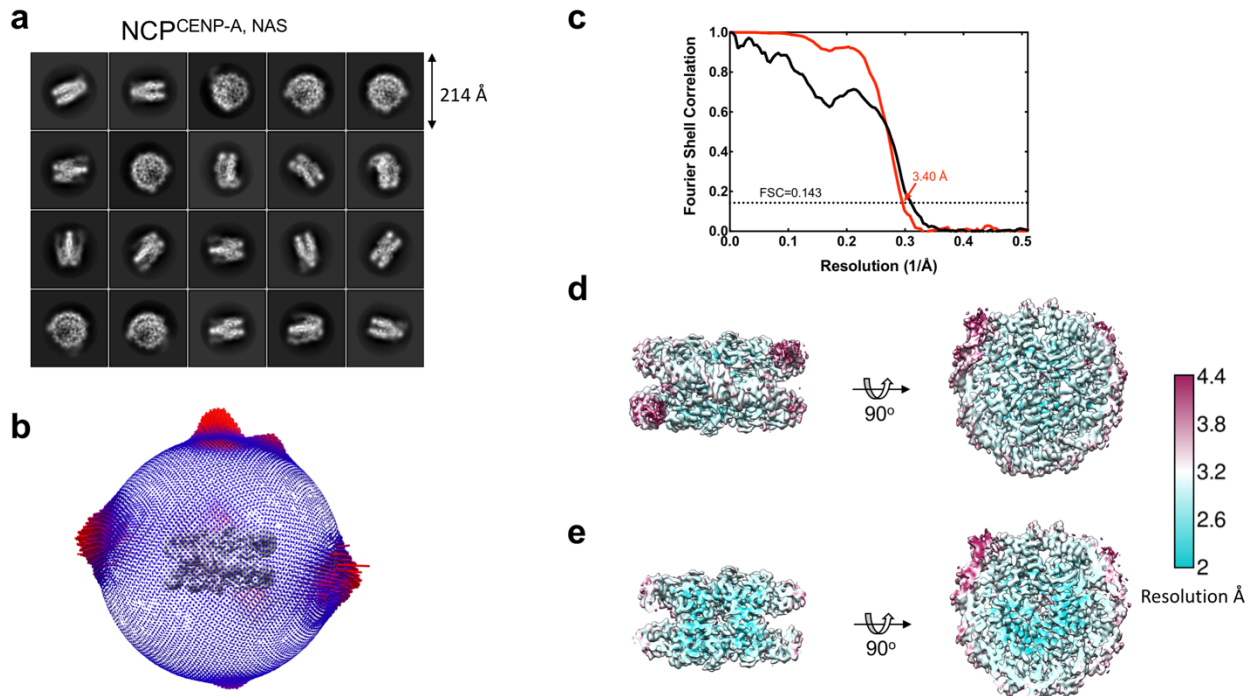

### Supplementary Figure 9. Cryo-EM analysis of NCP<sup>CENP-A, NAS</sup>

- a. Representative 2D class averages of NCP<sup>CENP-A, NAS</sup> particles.
  - b. Euler angle distribution of particles used in the final 3D reconstruction, the height of the cylinder is proportional to the number of particles for that view.
  - c. Gold-standard Fourier shell correlation (FSC) curves of the final density map. Reported resolutions were based on the FSC=0.143 criteria. Red curve is the scFv-NCP<sup>CENP-A, NAS</sup> FSC of two independent half maps and black curve is the structural model versus summed map FSC calculated by RELION.
  - d. The final 3D density map of NCP<sup>CENP-A, NAS</sup> shown in the indicated views is colored according to the local resolution estimated by the software ResMap.
  - e. The final half sliced 3D density map of scFv-NCP<sup>CENP-A, NAS</sup> shown in the indicated views is colored according to the local resolution estimated by the software ResMap.
- Data for the plot are provided as a Source Data file.



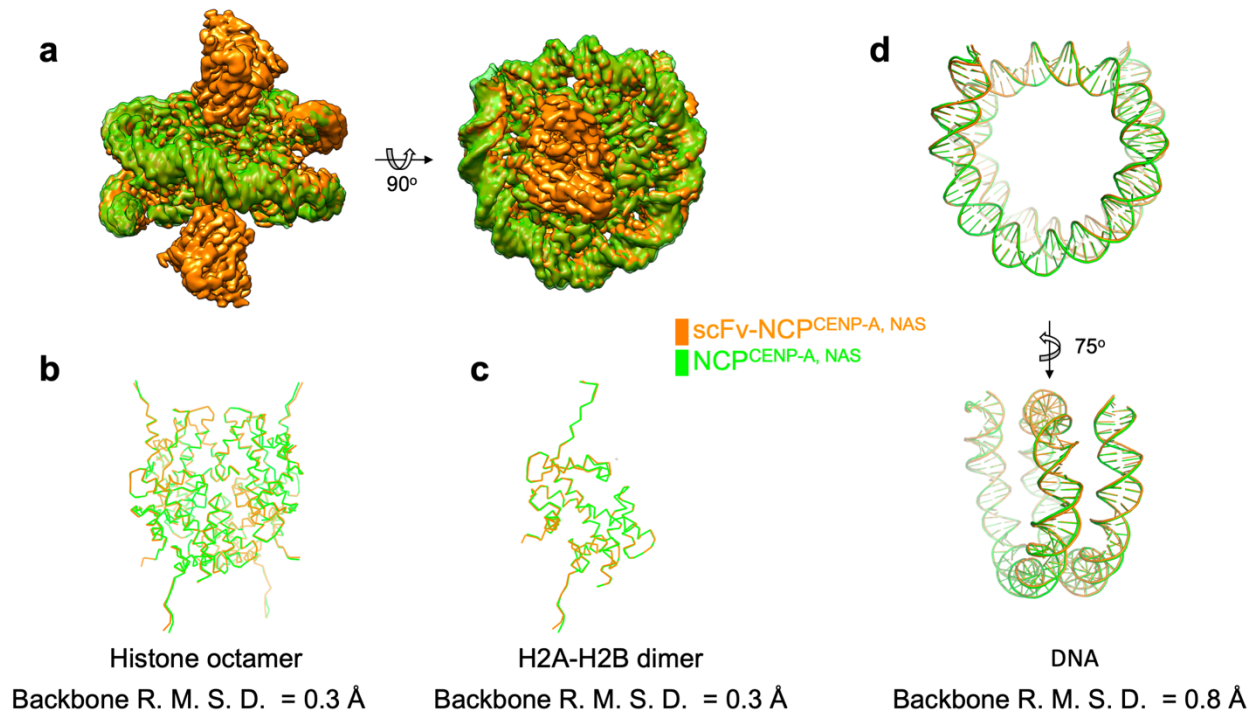

**Supplementary Figure 10. scFv does not perturb the structure of NCP<sup>CENP-A, NAS</sup>**

- Overlay the unsharpened cryo-EM maps of scFv-NCP<sup>CENP-A, NAS</sup> and the free NCP<sup>CENP-A, NAS</sup>
- Alignment of the structures of all core histones in scFv-NCP<sup>CENP-A, NAS</sup> and the free NCP<sup>CENP-A, NAS</sup>
- Alignment of the structures of core histones H2A and H2B in scFv-NCP<sup>CENP-A, NAS</sup> and the free NCP<sup>CENP-A, NAS</sup>
- Alignment of the structures of DNA in scFv-NCP<sup>CENP-A, NAS</sup> and the free NCP<sup>CENP-A, NAS</sup>

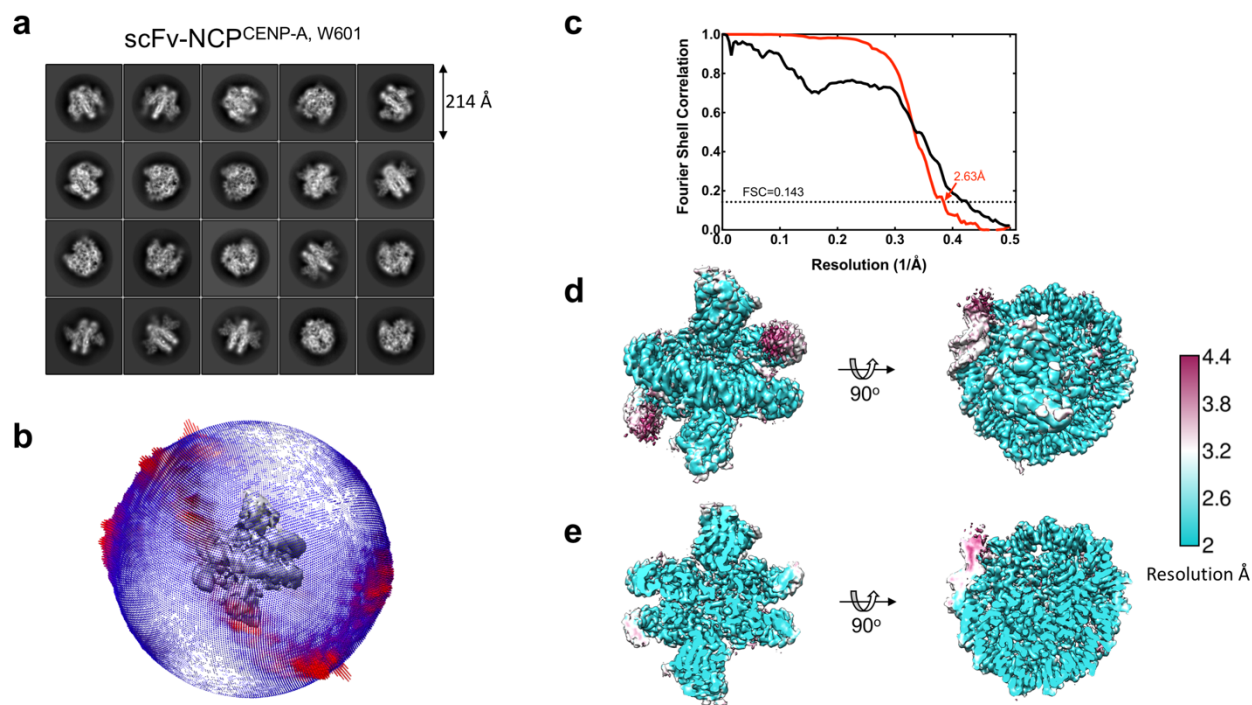

**Supplementary Figure 11. Cryo-EM analysis of the scFv-NCP<sup>CENP-A, W601</sup> complex.**

- a. Representative 2D class averages of scFv-NCP<sup>CENP-A, W601</sup> particles.
- b. Euler angle distribution of particles used in the final 3D reconstruction, the height of the cylinder is proportional to the number of particles for that view.
- c. Gold-standard Fourier shell correlation (FSC) curves of the final density map. Reported resolutions were based on the FSC=0.143 criteria. Red curve is the scFv-NCP<sup>CENP-A, W601</sup> half map FSC and black curve is the model versus map FSC.
- d. The final 3D density map of scFv-NCP<sup>CENP-A, W601</sup> shown in the indicated views is colored according to the local resolution estimated by the software ResMap.
- e. The final half sliced 3D density map of scFv-NCP<sup>CENP-A, W601</sup> shown in the indicated views is colored according to the local resolution estimated by the software ResMap.

Data for the plot are provided as a Source Data file.

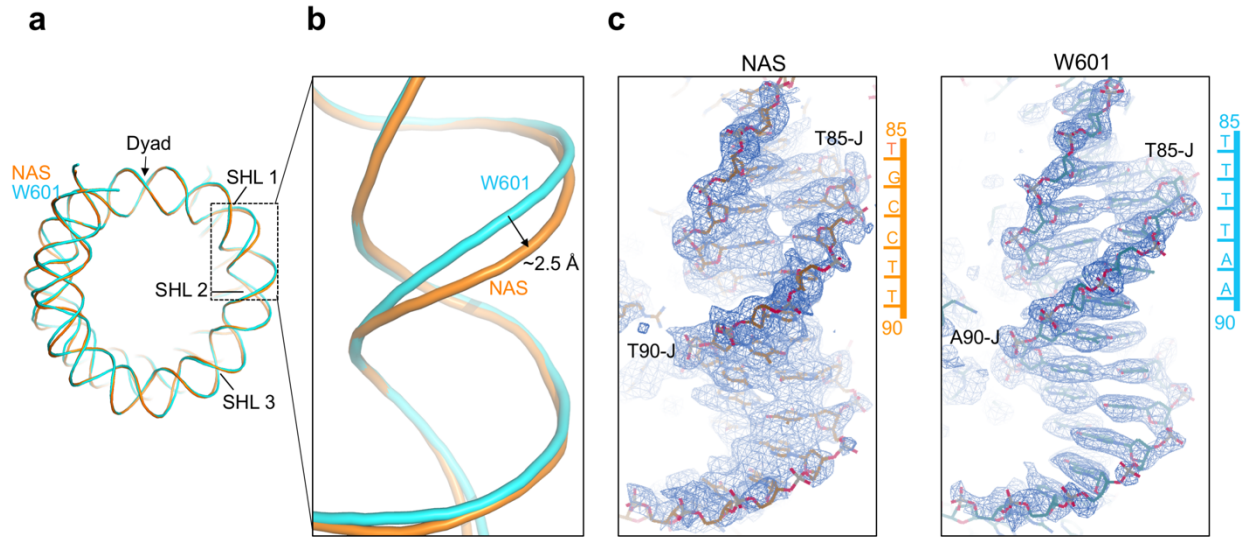

**Supplementary Figure 12. Comparison of the DNA conformation in scFv-NCP<sup>CENP-A</sup>**

**A, NAS and scFv-NCP<sup>CENP-A</sup>, W601.**

- a.** Alignment of the DNA in scFv-NCP<sup>CENP-A</sup>, NAS and scFv-NCP<sup>CENP-A</sup>, W601.
- b.** Enlarged region from SHL 1 to SHL 2.
- c.** Density maps corresponding to regions from SHL 1 to SHL 2.

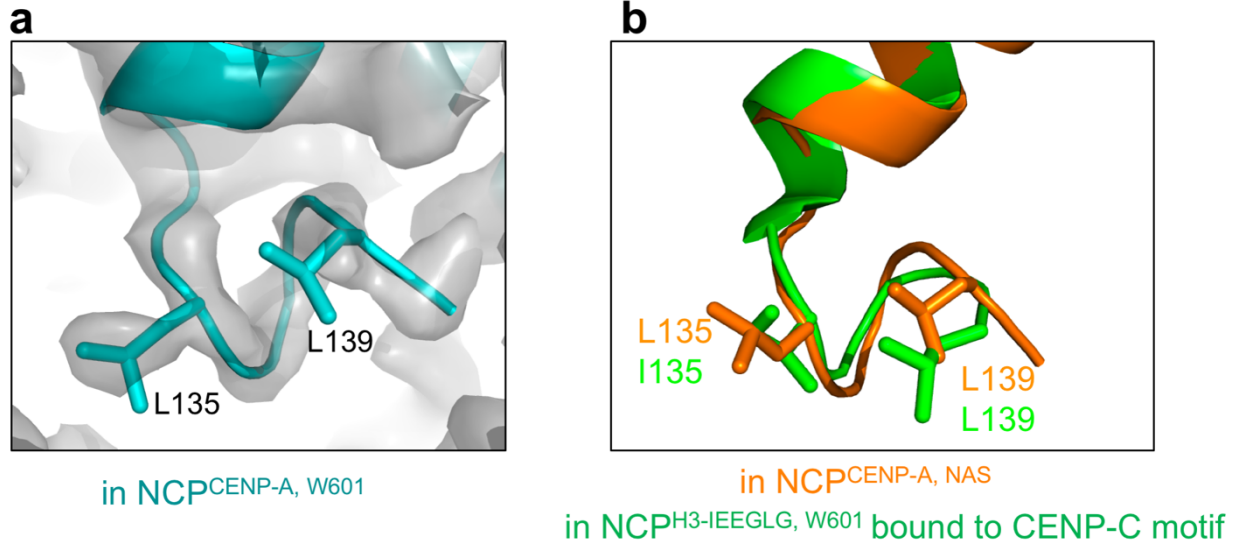

**Supplementary Figure 13. Conformation of the C-terminal tail of CENP-A.**

- a. Density map in the CENP-A C-terminal tail region in scFv-NCP<sup>CENP-A, W601</sup>.
- b. Structural alignment of CENP-A in scFv-NCP<sup>CENP-A, NAS</sup> and H3-IEEGLG in the NCP<sup>H3-IEEGLG, W601</sup> bound to CENP-C motif (PDB ID: 4X23).

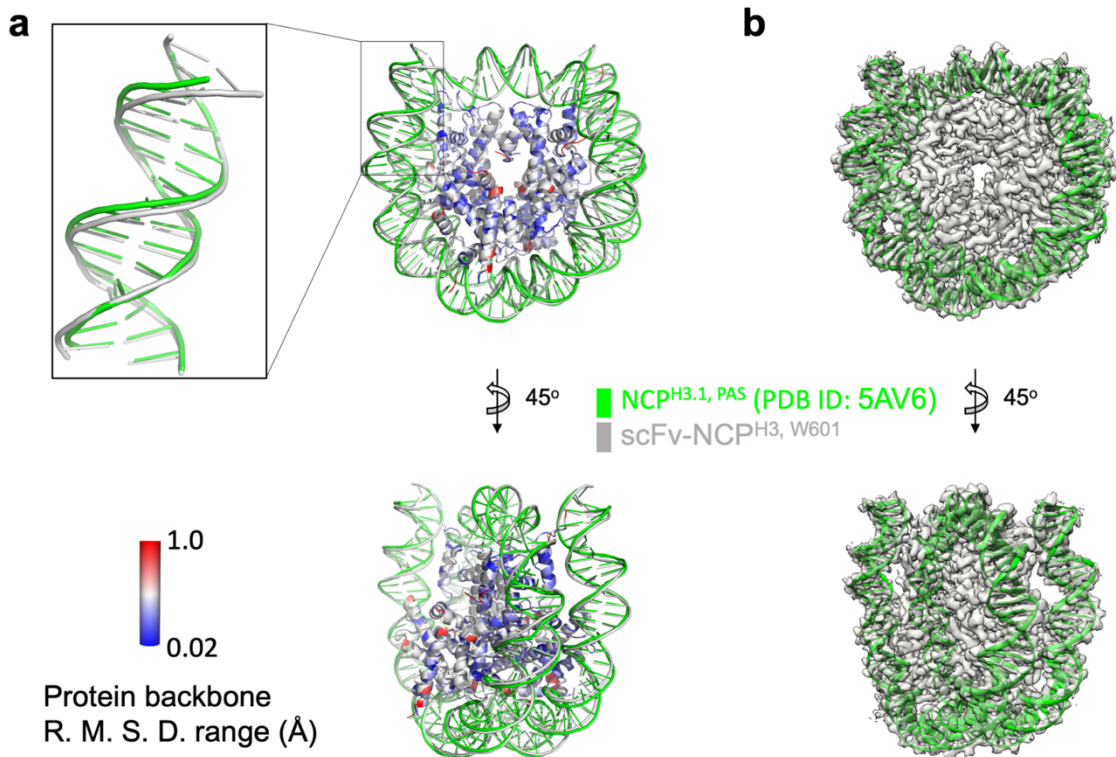

**Supplementary Figure 14. Comparison between crystal structure and cryo-EM structure of NCP with histone H3.**

- a.** Alignment of the crystal structure of NCP<sup>H3.1, PAS</sup> (PDB ID: 5AV6) and the Cryo-EM structure scFv-NCP<sup>H3, W601</sup>. Histone octamer of NCP<sup>H3.1, PAS</sup> is colored according to the local R. M. S. D. between two structures. The blue-white-red spectrum bar shows the range of local R. M. S. D. value of protein backbone atoms from 0.02 to 1.0 Å. DNA in NCP<sup>H3, PAS</sup> structure is colored in green and scFv-NCP<sup>H3, W601</sup> structure is colored in light grey. Enlarged panel shows that the backbones of the DNA ends in the two structures display similar closed conformation.
- b.** NCP<sup>H3.1, PAS</sup> structure (PDB ID: 5AV6) can be fitted well into the cryo-EM density map of scFv-NCP<sup>H3, W601</sup>. Only DNA ribbon structure (green) is shown. scFv densities are masked out for clarity. Figure is prepared in Chimera with map level at 0.0146.

## Supplementary Table 1 | Cryo-EM data collection, refinement and validation statistics

|                                                  | scFv-<br>NCP <sup>H3,W601</sup><br>(PDB 6DZT)<br>(EMD-8938) | scFv-<br>NCP <sup>CENP-A,W601</sup><br>(PDB 6E0C)<br>(EMD- 8945) | scFv-<br>NCP <sup>CENP-A, NAS</sup><br>(PDB 6E0P)<br>(EMD- 8949) | NCP <sup>CENP-A, NAS</sup><br>(PDB 6O1D)<br>(EMD- 0586) |
|--------------------------------------------------|-------------------------------------------------------------|------------------------------------------------------------------|------------------------------------------------------------------|---------------------------------------------------------|
| <b>Data collection and processing</b>            |                                                             |                                                                  |                                                                  |                                                         |
| Magnification                                    | 14k                                                         | 18k                                                              | 18k                                                              | 18k                                                     |
| Voltage (kV)                                     | 300                                                         | 300                                                              | 300                                                              | 300                                                     |
| Electron exposure (e-/Å <sup>2</sup> )           | 40                                                          | 40                                                               | 40                                                               | 40                                                      |
| Defocus range (μm)                               | 0.8-2.0                                                     | 0.8-1.6                                                          | 0.8-1.6                                                          | 0.8-1.6                                                 |
| Physical pixel size (Å)                          | 1.72                                                        | 1.358                                                            | 1.358                                                            | 1.358                                                   |
| Symmetry imposed                                 | C1                                                          | C1                                                               | C1                                                               | C1                                                      |
| Initial particle images (no.)                    | 765,253                                                     | 629,392                                                          | 520,603                                                          | 841,392                                                 |
| Final particle images (no.)                      | 238,790                                                     | 494,510                                                          | 301,644                                                          | 303,863                                                 |
| Map resolution (Å)                               | 2.99                                                        | 2.63                                                             | 2.59                                                             | 3.40                                                    |
| FSC threshold                                    | 0.143                                                       | 0.143                                                            | 0.143                                                            | 0.143                                                   |
| Map resolution range (Å)                         | 2.0 – 6.9                                                   | 2.0 – 4.0                                                        | 2.0 – 4.0                                                        | 2.6 – 6.8                                               |
| <b>Refinement</b>                                |                                                             |                                                                  |                                                                  |                                                         |
| Initial model used (PDB code)                    | 3LZ0, 1KX5,<br>2GKI                                         | 3AN2                                                             | 3AN2                                                             | 6E0P                                                    |
| Model vs map resolution (Å)                      | 3.10                                                        | 2.92                                                             | 3.12                                                             | 3.68                                                    |
| FSC threshold                                    | 0.5                                                         | 0.5                                                              | 0.5                                                              | 0.5                                                     |
| Map sharpening <i>B</i> factor (Å <sup>2</sup> ) | -63                                                         | -20                                                              | -24                                                              | -80                                                     |
| Model composition                                |                                                             |                                                                  |                                                                  |                                                         |
| Nucleic acid (bp)                                | 147                                                         | 147                                                              | 145                                                              | 145                                                     |
| Protein residues                                 | 1213                                                        | 1220                                                             | 1220                                                             | 671                                                     |
| R.m.s. deviations                                |                                                             |                                                                  |                                                                  |                                                         |
| Bond lengths (Å <sup>2</sup> )                   | 0.01                                                        | 0.008                                                            | 0.007                                                            | 0.01                                                    |
| Bond angles (°)                                  | 0.885                                                       | 0.783                                                            | 0.863                                                            | 0.922                                                   |
| Validation                                       |                                                             |                                                                  |                                                                  |                                                         |
| MolProbity score                                 | 1.23                                                        | 1.39                                                             | 1.33                                                             | 1.18                                                    |
| Clashscore                                       | 2.08                                                        | 2.04                                                             | 2.41                                                             | 1.96                                                    |
| Poor rotamers (%)                                | 0.00                                                        | 0.19                                                             | 0.00                                                             | 0.00                                                    |
| Ramachandran plot                                |                                                             |                                                                  |                                                                  |                                                         |
| Favored (%)                                      | 96.30                                                       | 95.74                                                            | 95.57                                                            | 96.65                                                   |
| Allowed (%)                                      | 3.70                                                        | 4.26                                                             | 4.43                                                             | 3.35                                                    |
| Disallowed (%)                                   | 0.00                                                        | 0.00                                                             | 0.00                                                             | 0.00                                                    |
