# Supplementary material for: Atomic resolution cryo-EM structure of a native-like CENP-A nucleosome aided by an antibody fragment
Source: PubMed Central journal article supplement (PMC6534667; doi:10.1038/s41467-019-10247-4), 2019-05-24
Supplement: 41467_2019_10247_MOESM3_ESM.pdf [file 41467_2019_10247_MOESM3_ESM.pdf]

## **Description of Additional Supplementary Files**

**File name:** Supplementary Movie 1

**Description:** Cryo-EM map and structural features of human CENP-A nucleosome bound to the scFv.
